# Supplementary material for: Invasive success of star weed (Parthenium hysterophorus L.) through alteration in structural and functional peculiarities
Source: PeerJ. 2023 Dec 13;11:e16609. doi: 10.7717/peerj.16609 (PMC10725175; doi:10.7717/peerj.16609)
Supplement: Supplemental Information 3 [file peerj-11-16609-s003.xlsx]

## Sheet: Sheet1
Sites	ECe	pH	OM	SP	PO4	NO3	Cl	Ca	Na	K	TSP	GB	Chl a	Chl b	TChl	Car	Chl a/b	TChl/Car	PH	SFW	SDW	LN	RL	RFW	RDW	LA	SL
RYK	6.73	6.2	0.35	36	3.1	3.3	567.8	156.1	398.9	64.4	47.94	3.57	0.68	4.25	4.93	4.505	0.16	1.09434	37	6.3	3.1	29.5	8	1.5	2.2	4.9	30
SDK	0.76	8.4	0.42	16	1.6	2.9	83.4	54.2	54.2	70.1	26.35	3.825	2.38	6.205	8.585	1.36	0.383562	6.3125	46	8.2	4.1	18.5	6	0.5	0.5	53.4	40.3
KHP	6.69	8.8	0.28	38	3.4	4	434.5	67.7	297.1	260.3	21.675	2.635	0.935	3.655	4.59	2.38	0.255814	1.92857	40.3	11.5	5.8	25.5	8	1.5	1.5	19.2	31
BWP	0.96	8.7	0.28	17	1.9	2.9	102.7	71.9	147.8	80.8	136.255	10.2	1.615	11.815	13.43	5.355	0.136691	2.50794	56.5	9.4	4.7	17	11.5	0.7	0.7	65.2	44.7
LAP	3.46	8	0.35	15	2.2	3.2	389.1	97.3	297.1	180.9	20.825	2.21	0.68	2.975	3.655	2.805	0.228571	1.30303	45	8.2	4.1	19	10	1.4	1.4	38.4	35
AHP	1.06	8.6	0.42	16	1.9	3.5	130.5	63.5	164.1	148.5	23.12	2.465	1.19	3.655	4.845	1.785	0.325581	2.71429	31	5.4	2.7	10.5	7.7	0.6	0.6	39.2	26
MUL	4.33	7.8	0.56	22	2.2	3.2	72.1	60.2	266.1	276.3	22.78	2.38	0.425	2.805	3.23	4.76	0.151515	0.678571	39.5	7.7	3.9	14	5.7	0.7	0.7	23.9	33
VEH	1.15	8.2	0.21	32	3.1	4.3	109.8	78.7	180.7	124.1	9.35	2.125	0.68	2.805	3.485	2.635	0.242424	1.32258	41.2	11	5.6	22	4.5	0.7	0.7	65.4	36.3
MUZ	1.33	8.2	0.28	17	1.9	2	178.6	110.9	134	80.1	32.045	2.38	0.425	2.805	3.23	4.76	0.151515	0.678571	37.3	4.5	2.2	15.5	7.3	0.7	0.7	38	30.4
SAR	0.77	8.5	0.45	18	1.9	4	79.6	77.1	175	75.2	29.75	3.06	0.34	3.485	3.825	7.65	0.097561	0.5	20.3	4.5	2	14.5	7.7	0.4	0.4	6.6	16.3
FSD	1.08	8.7	0.43	19	2.3	4	111.6	104.3	147.1	196.6	35.7	2.38	0.255	2.635	2.89	7.905	0.0967742	0.365591	37.7	9.4	4.7	18.5	10	0.6	0.6	27.6	28
DGK	1.19	8.7	0.28	38	3.4	4	71.1	66.7	60.8	258.3	19.295	2.635	0.68	3.23	3.91	3.315	0.210526	1.17949	36.3	4.7	2.3	11	6	0.8	0.8	47.9	30
RJP	0.9	8.5	0.26	16	1.8	2.8	100.7	70.9	145.8	79.8	41.905	3.91	1.36	5.27	6.63	2.465	0.258065	2.68966	43	11.5	5.8	20.5	10	1.5	1.5	59.3	33
JHG	3.01	8	0.35	15	2.2	3.2	389.1	97.3	61.8	180.9	24.65	1.87	0.34	2.21	2.55	4.675	0.153846	0.545455	16.3	3	1.2	9	6	0.5	0.5	33.7	11.3
RYK	1.2	8.9	0.3	42	3.6	5.1	198.3	94.3	88.9	276.8	30	24	4.4	2	7.2	0.5	0.1	9.5	37.2	22.1	1.6	2.3	2	1.6	3.7	1.6	1

## Sheet: Sheet2
	TSP	GB	Chl a	Chl b	TChl	Car	Chl a/b	TChl/Car	PH	SFW	SDW	LN	RL	RFW	RDW	LA	SL
	47.94	3.57	0.68	4.25	4.93	4.505	0.16	1.09434	37	6.3	3.1	29.5	8	1.5	2.2	4.9	30
	26.35	3.825	2.38	6.205	8.585	1.36	0.383562	6.3125	46	8.2	4.1	18.5	6	0.5	0.5	53.4	40.3
	21.675	2.635	0.935	3.655	4.59	2.38	0.255814	1.92857	40.3	11.5	5.8	25.5	8	1.5	1.5	19.2	31
	136.255	10.2	1.615	11.815	13.43	5.355	0.136691	2.50794	56.5	9.4	4.7	17	11.5	0.7	0.7	65.2	44.7
	20.825	2.21	0.68	2.975	3.655	2.805	0.228571	1.30303	45	8.2	4.1	19	10	1.4	1.4	38.4	35
	23.12	2.465	1.19	3.655	4.845	1.785	0.325581	2.71429	31	5.4	2.7	10.5	7.7	0.6	0.6	39.2	26
	22.78	2.38	0.425	2.805	3.23	4.76	0.151515	0.678571	39.5	7.7	3.9	14	5.7	0.7	0.7	23.9	33
	9.35	2.125	0.68	2.805	3.485	2.635	0.242424	1.32258	41.2	11	5.6	22	4.5	0.7	0.7	65.4	36.3
	32.045	2.38	0.425	2.805	3.23	4.76	0.151515	0.678571	37.3	4.5	2.2	15.5	7.3	0.7	0.7	38	30.4
	29.75	3.06	0.34	3.485	3.825	7.65	0.097561	0.5	20.3	4.5	2	14.5	7.7	0.4	0.4	6.6	16.3
	35.7	2.38	0.255	2.635	2.89	7.905	0.0967742	0.365591	37.7	9.4	4.7	18.5	10	0.6	0.6	27.6	28
	19.295	2.635	0.68	3.23	3.91	3.315	0.210526	1.17949	36.3	4.7	2.3	11	6	0.8	0.8	47.9	30
	41.905	3.91	1.36	5.27	6.63	2.465	0.258065	2.68966	43	11.5	5.8	20.5	10	1.5	1.5	59.3	33
	24.65	1.87	0.34	2.21	2.55	4.675	0.153846	0.545455	16.3	3	1.2	9	6	0.5	0.5	33.7	11.3

## Sheet: Sheet3
Sites	EpT	CT	CCA	VBA	MA	PhA		RA	EpT	CT	CCA	VBA	MA	PhA		MrT	LMT	EpT	CT	CCA	VBA	MA	PhA
RYK	18.8	94.2	14.1	70.7	12.6	0.6		259.1	9.4	18.8	12.6	94.2	12.6	20.4		379.9	22	18.8	117.8	14.1	47.1	18.8	15.7
SDK	17.3	37.7	9.4	94.2	11	0.8		282.6	14.1	23.6	9.4	94.2	15.7	14.1		420.8	14.1	15.7	106.8	14.1	117.8	37.7	23.6
KHP	12.6	51.8	14.1	70.7	15.7	0.5		259.1	9.4	18.8	7.9	94.2	17.3	36.1		376.8	18.8	22	141.3	15.7	92.6	29.8	11.8
BWP	18.8	45.5	11	141.3	15.7	0.7		259.1	14.1	33	6.3	131.9	9.4	40.8		337.6	14.1	14.1	180.6	15.7	83.2	12.9	16
LAP	22	55	9.4	69.1	12.6	0.5		306.2	14.1	55	14.1	108.3	14.1	47.1		329.7	22	22	139.7	12.6	70.7	17.3	14.1
AHP	17.3	37.7	9.4	94.2	11	0.9		304.6	18.8	47.1	9.4	164.9	14.1	48.7		235.5	17.3	23.6	117.8	11	69.1	16.2	12.2
MUL	31.4	55	9.4	55	12.6	0.8		306.2	23.6	70.7	9.4	146	18.8	45.5		329.7	18.8	12.6	150.7	15.7	69.1	11.8	16
VEH	17.3	65.9	11	70.7	9.4	0.6		306.2	18.8	47.1	9.4	117.8	9.4	47.1		389.4	58.1	15.7	185.3	18.8	70.7	22	20.4
MUZ	14.1	55	9.4	65.9	12.6	0.6		353.3	14.1	67.5	11	146	14.1	58.1		376.8	17.3	14.1	153.9	11	83.2	22	20.4
SAR	15.7	67.5	9.4	67.5	11	0.9		329.7	9.4	47.1	9.4	149.2	14.1	47.1		329.7	11	12.6	158.6	14.1	97.3	20.4	22
FSD	22	55	9.4	70.7	14.1	0.5		282.6	14.1	47.1	11	128.7	14.1	47.1		329.7	14.1	17.3	127.2	14.1	69.1	25.1	23.6
DGK	15.7	36.1	9.4	70.7	15.7	0.6		329.7	9.4	39.3	9.4	117.8	9.4	42.4		329.7	14.1	17.3	122.5	18.8	92.6	17.3	20.4
RJP	22	55	9.4	67.5	9.4	0.7		400.4	23.6	59.7	9.4	133.5	14.1	47.1		282.6	28.3	15.7	139.7	14.1	70.7	18.8	28.3
JHG	14.1	31.4	9.4	70.7	12.6	0.6		400.4	14.1	47.1	14.1	94.2	14.1	58.1		235.5	26.7	18.8	102.1	9.4	70.7	14.1	15.7
RYK	9.4	65.9	9.4	69.1	14.1	0.9		353.3	14.1	47.1	14.1	133.5	9.4	69.1		282.6	14.1	15.7	119.3	9.4	83.2	22	20.4
